# Supplementary material for: Knockdown of Placental Major Facilitator Superfamily Domain Containing 2a in Pregnant Mice Reduces Fetal Brain Growth and Phospholipid Docosahexaenoic Acid Content
Source: MDPI journal article supplement (doi:10.3390/nu15234956), 2023-11-29
Supplement: s1 [file s1]

## Supplemental Tables

Supplementary Table S1. Primers for QPCR.

| Target mRNA  | Forward primer         | Reverse Primer          |
|--------------|------------------------|-------------------------|
| Mouse Mfsd2a | AGAAGCAGCAACTGTCCATTT  | CTCGGCCCCACAAAAAGGATAAT |
| Rpl19        | ATGAGTATGCTCAGGCTACAGA | GCATTGGCGATTTCATTGGTC   |

**Supplemental Table S2. Phospholipid levels in fetal brain at E18.5.**

| <b>Phospholipid</b>     | <b>MFSD2a (n=33)</b> | <b>SCR (n=26)</b> | <b>P Value</b> |
|-------------------------|----------------------|-------------------|----------------|
| PE (16:0_22:6)          | 2.4±0.68             | 2.77±0.72         | <b>0.0492</b>  |
| PE (16:0e_22:6)         | 0.19±0.06            | 0.23±0.07         | <b>0.0183</b>  |
| PE (16:1e_22:6)         | 1.4±0.4              | 1.64±0.37         | <b>0.0208</b>  |
| PE (18:0_22:6)          | 1.89±0.57            | 2.22±0.8          | 0.087          |
| PE (18:1_22:6)          | 0.52±0.15            | 0.6±0.19          | 0.0862         |
| PE (18:0e_22:6)         | 0.43±0.15            | 0.5±0.14          | 0.0612         |
| PE (18:1e_22:6)         | 2.25±0.75            | 2.7±0.71          | <b>0.0218</b>  |
| LPE (22:6)              | 0.03±0.01            | 0.04±0.01         | 0.0517         |
| Total PE containing DHA | 9.08±2.4             | 10.66±2.38        | <b>0.0144</b>  |
| PC (16:0_22:6)          | 0.77±0.24            | 0.85±0.23         | 0.2030         |
| PC (16:0e_22:6)         | 0.03±0.01            | 0.03±0.01         | 0.0731         |
| PC (16:1e_22:6)         | 0.01±0.01            | 0.01±0            | 0.3503         |
| PC (18:0_22:6)          | 0.64±0.18            | 0.73±0.17         | <b>0.0423</b>  |
| PC (18:1_22:6)          | 0.28±0.08            | 0.3±0.07          | 0.2301         |
| PC (18:0e_22:6)         | 0.02±0.01            | 0.02±0.01         | 0.2233         |
| PC (18:1e_22:6)         | 0.03±0.01            | 0.04±0.01         | 0.1183         |
| LPC (22:6)              | 0±0                  | 0.01±0.01         | 0.0421         |
| Total PC containing DHA | 1.77±0.52            | 1.99±0.48         | 0.1079         |
| Total Brain PE+PC DHA   | 10.89±2.89           | 12.7±2.8          | <b>0.0184</b>  |

**Supplemental Table S3. Phospholipid levels in placenta at E18.5.**

| <b>Phospholipid</b>      | <b>MFSD2a (n=26)</b> | <b>SCR (n=22)</b> | <b>P Value</b> |
|--------------------------|----------------------|-------------------|----------------|
| PE (16:0_22:6)           | 0.41±0.17            | 0.42±0.17         | 0.8502         |
| PE (16:0e_22:6)          | 0.06±0.02            | 0.05±0.02         | 0.7421         |
| PE (16:1e_22:6)          | 0.72±0.29            | 0.71±0.3          | 0.8456         |
| PE (18:0_22:6)           | 1.12±0.36            | 1.11±0.35         | 0.9257         |
| PE (18:1_22:6)           | 0.13±0.07            | 0.12±0.07         | 0.5541         |
| PE (18:0e_22:6)          | 0.09±0.03            | 0.09±0.04         | 0.931          |
| PE (18:1e_22:6)          | 0.96±0.37            | 0.97±0.42         | 0.9208         |
| LPE (22:6)               | 0.09±0.04            | 0.09±0.04         | 0.9992         |
| Total PE containing DHA  | 3.583±0.25           | 3.563±0.29        | 0.9574         |
| PC (16:0_22:6)           | 0.72±0.36            | 0.76±0.37         | 0.733          |
| PC (16:0e_22:6)          | 0.13±0.07            | 0.14±0.07         | 0.7208         |
| PC (16:1e_22:6)          | 0.13±0.08            | 0.13±0.07         | 0.8807         |
| PC (18:0_22:6)           | 1.29±0.6             | 1.35±0.62         | 0.7486         |
| PC (18:1_22:6)           | 0.09±0.06            | 0.09±0.05         | 0.9288         |
| PC (18:0e_22:6)          | 0.13±0.07            | 0.15±0.1          | 0.4936         |
| PC (18:1e_22:6)          | 0.16±0.09            | 0.16±0.09         | 0.7937         |
| LPC (22:6)               | 0.1±0.04             | 0.11±0.04         | 0.75           |
| Total PC containing DHA  | 2.66±1.29            | 2.78±1.34         | 0.7539         |
| Total Placenta PE+PC DHA | 6.34±2.58            | 6.45±0.57         | 0.8925         |
